# Supplementary material for: Evaluating the reliability of U–Pb laser ablation inductively coupled plasma mass spectrometry (LA-ICP-MS) carbonate geochronology: matrix issues and a potential calcite validation reference material
Source: Copernicus journal article supplement (doi:10.5194/gchron-2-155-2020), 2020-06-30
Supplement: Supplementary file 1 [file gchron-2-155-2020-supplement.zip]

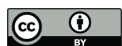

## *Supplement of*

# **Evaluating the reliability of U–Pb laser ablation inductively coupled plasma mass spectrometry (LA-ICP-MS) carbonate geochronology: matrix issues and a potential calcite validation reference material**

**Marcel Guillong et al.**

*Correspondence to:* Marcel Guillong ([guillong@erdw.ethz.ch](mailto:guillong@erdw.ethz.ch))

- [gchron-2-155-2020-supplement-title-page.pdf](#)
- [Table S1-S2-S3.xlsx](#)
- [additional characterisation of JT.pdf](#)

The copyright of individual parts of the supplement might differ from the CC BY 4.0 License.
